# Supplementary material
Source: publisher figshare collection journal article supplement (https://acs.figshare.com/ndownloader/files/14794493)
Supplement: Supplementary file 1 [file 14794493]

## Sheet: Legend
Supporting Table S5 - ACVR1 Kinase Activity Assay
Compounds were tested in 10-dose IC50 mode with 3-fold serial dilution starting at 10 μM
Control Compound, LDN193189, was tested in 10-dose IC50 mode with 3-fold serial dilution starting at 10 μM
Reactions were carried out at Km ATP according to the RBC binning structure
Data pages include raw data, % Enzyme activity (relative to DMSO controls), and curve fits.
*Curve fits were performed where the enzyme activities at the highest concentration of compounds were less than 65%.

## Sheet: ACVR1
Kinase Profiling Report for: ALK2/ACVR1 at ATP conc. 5 µM
Raw data	Conc.(M)	CP466722	LDN193189	LDN193189 Conc.(M)
	1e-05	22304.4	3912.51	1e-05
	3.33333e-06	56462.8	1829.6	3.33333e-06
	1.11111e-06	125521	-1599.11	1.11111e-06
	3.7037e-07	249000	2912.57	3.7037e-07
	1.23457e-07	352391	287.012	1.23457e-07
	4.11523e-08	374894	22783.2	4.11523e-08
	1.37174e-08	368133	242957	1.37174e-08
	4.57247e-09	361630	309873	4.57247e-09
	1.52416e-09	345101	325192	1.52416e-09
	5.08053e-10	353773	328139	5.08053e-10
	DMSO	363721	326940	DMSO
%Activity	Conc.(M)	CP466722	LDN193189	LDN193189 Conc.(M)
	1e-05	6.45885	1.13298	1e-05
	3.33333e-06	16.3504	0.529811	3.33333e-06
	1.11111e-06	36.3482	-0.463068	1.11111e-06
	3.7037e-07	72.1047	0.843416	3.7037e-07
	1.23457e-07	102.044	0.0831121	1.23457e-07
	4.11523e-08	108.561	6.59751	4.11523e-08
	1.37174e-08	106.603	70.3548	1.37174e-08
	4.57247e-09	104.72	89.7322	4.57247e-09
	1.52416e-09	99.9335	94.1684	1.52416e-09
	5.08053e-10	102.445	95.0218	5.08053e-10
	DMSO	105.325	94.6746	DMSO
	HILLSLOPE	-1.333	-3.282
	IC50 (M)	7.287e-07	1.911e-08

## Sheet: ACVR1(Q207D)
Kinase Profiling Report for: ACVR1(Q207D) at ATP conc. 2.5 µM
Raw data	Conc.(M)	CP466722	LDN193189	LDN193189 Conc.(M)
	1e-05	8985.9	88.7448	1e-05
	3.33333e-06	20335.2	-2686.02	3.33333e-06
	1.11111e-06	54943.2	-4649.71	1.11111e-06
	3.7037e-07	119428	-427.505	3.7037e-07
	1.23457e-07	178570	1086.83	1.23457e-07
	4.11523e-08	211862	1551.92	4.11523e-08
	1.37174e-08	210963	124974	1.37174e-08
	4.57247e-09	219831	187723	4.57247e-09
	1.52416e-09	214206	206442	1.52416e-09
	5.08053e-10	217957	206553	5.08053e-10
	DMSO	205789	203493	DMSO
%Activity	Conc.(M)	CP466722	LDN193189	LDN193189 Conc.(M)
	1e-05	4.39105	0.043366	1e-05
	3.33333e-06	9.93703	-1.31255	3.33333e-06
	1.11111e-06	26.8486	-2.27213	1.11111e-06
	3.7037e-07	58.3597	-0.208905	3.7037e-07
	1.23457e-07	87.2601	0.531092	1.23457e-07
	4.11523e-08	103.528	0.75836	4.11523e-08
	1.37174e-08	103.089	61.0699	1.37174e-08
	4.57247e-09	107.423	91.7327	4.57247e-09
	1.52416e-09	104.674	100.88	1.52416e-09
	5.08053e-10	106.507	100.934	5.08053e-10
	DMSO	100.561	99.439	DMSO
	HILLSLOPE	-1.211	-3.543
	IC50 (M)	4.582e-07	1.562e-08

## Sheet: ACVR1(R206H)
Kinase Profiling Report for: ACVR1(R206H) at ATP conc. 10 µM
Raw data	Conc.(M)	CP466722	LDN193189	LDN193189 Conc.(M)
	1e-05	7515.04	-869.043	1e-05
	3.33333e-06	19531.7	1601.35	3.33333e-06
	1.11111e-06	36577	646.932	1.11111e-06
	3.7037e-07	55023.1	-776.281	3.7037e-07
	1.23457e-07	75667.1	-2467.4	1.23457e-07
	4.11523e-08	88796.6	-376.426	4.11523e-08
	1.37174e-08	79206.1	13422	1.37174e-08
	4.57247e-09	81924.7	53038.6	4.57247e-09
	1.52416e-09	84345.1	67925.2	1.52416e-09
	5.08053e-10	81106.9	79143.6	5.08053e-10
	DMSO	81547.3	75383.4	DMSO
%Activity	Conc.(M)	CP466722	LDN193189	LDN193189 Conc.(M)
	1e-05	9.57753	-1.10755	1e-05
	3.33333e-06	24.8922	2.04084	3.33333e-06
	1.11111e-06	46.6155	0.824482	1.11111e-06
	3.7037e-07	70.1241	-0.98933	3.7037e-07
	1.23457e-07	96.4339	-3.14458	1.23457e-07
	4.11523e-08	113.167	-0.479735	4.11523e-08
	1.37174e-08	100.944	17.1057	1.37174e-08
	4.57247e-09	104.409	67.595	4.57247e-09
	1.52416e-09	107.493	86.5671	1.52416e-09
	5.08053e-10	103.367	100.864	5.08053e-10
	DMSO	103.928	96.0722	DMSO
	HILLSLOPE	-1.011	-2.077
	IC50 (M)	8.87e-07	6.637e-09
